# Supplementary material for: Phosphoproteomic analysis reveals the effects of sleep deprivation on the hippocampus in mice
Source: Royal Society of Chemistry journal article supplement (doi:10.1039/d2mo00061j), 2022-06-27
Supplement: d2mo00061j1.xlsx [file d2mo00061j1.xlsx]

## Sheet: sd vs con 
Protein	Sequence	log2(Fold change)	p-value	sig
P26350	VAEDDEDDDVDTK	3.32856	1.28314e-05	up
Q61316	HAEQNGPVDGQGDNPGSQAAEHGADTAVPSDGDK	1.20118	0.0439284	up
Q9CQI6	ELEEDFIR	-1.19291	0.0425697	down
P16546	DLAALEDK	-1.32709	0.045271	down
P32037	EEDQATEILQR	-1.38308	0.0308751	down
Q9D898	SSEIEQAVQSLDR	-1.4555	0.0278862	down
Q8BG05	IETIEVMEDR	-1.47588	0.0341583	down
P68368	EIIDPVLDR	-1.52606	0.0446358	down
Q9Z140	LLDGDDGPLR	-1.72474	0.0425428	down
Q9CQQ7	QIQDAIDMEK	-1.77216	0.0399379	down
P26443	CVGVGESDGSIWNPDGIDPK	-1.82691	0.0491308	down
O88569	QEMQEVQSSR	-1.94941	0.0274128	down
Q7TQF7	DEQFEEYVQNFK	-1.97898	0.0412406	down
P11499	EGLELPEDEEEK	-1.9956	0.0406429	down
P68372	EAESCDCLQGFQLTHSLGGGTGSGMGTLLISK	-2.13609	0.0360161	down
Q61644	TTPQYMEGMEQVFEQCQQFEEK	-2.32407	0.0403257	down
Q9Z2I9	YDATMVEINPMVEDSDGK	-2.32676	0.0304237	down
Q8BXV2	ATSSFSQSVSSLFGEDNVR	-2.34709	0.0392801	down
Q62261	LAEISDVWEEMK	-2.35092	0.00863499	down
Q3UHL1	SDDIASADR	-2.97529	0.00187328	down
P08553	EYQDLLNVK	-3.41974	0.00501181	down
P63017	NQVAMNPTNTVFDAK	-3.54298	0.00598295	down
Q9Z1G4	ANIPIMDTGENPEVPFPR	-3.58152	0.0307903	down
O88935	TYATAEPFIDAK	-3.5894	0.00848536	down
P10852	DEINETDLK	-3.64203	0.015676	down
Q9DBG3	DIPNENELQFQIK	-3.80492	0.0238517	down
P46096	HWSDMLANPR	-4.05087	0.0476688	down
