# Supplementary material for: Phosphoproteomic analysis reveals the effects of sleep deprivation on the hippocampus in mice
Source: Royal Society of Chemistry journal article supplement (doi:10.1039/d2mo00061j), 2022-06-27
Supplement: d2mo00061j2.xlsx [file d2mo00061j2.xlsx]

## Sheet: sd vs con 
Protein	Sequence window	Phospho (STY) Probabilities	log2(Fold change)	p-value	sig
Q640R3	RKNPMALYILKDKDSSEPDENPATEPRSTTE	DKDS(0.032)S(0.968)EPDENPATEPR	4.50696	0.00015857	up
Q61464	PVEVKQSSVTQVTEQSPKVQSRYTKESASSI	QSS(0.004)VT(0.029)QVT(0.074)EQS(0.893)PK	4.01372	0.0484019	up
Q640N2	RVVDSYREALSQQLDSEDEQDQRGSESGENS	EALSQQLDS(1)EDEQDQR	3.98667	0.0366996	up
Q3TY65	TEGSCLTTDLNKVALSEEEEEERFEREPAVA	VALS(1)EEEEEERFER	3.83228	0.0449185	up
Q14BB9	RTARVVTTHSSGWDPSPGASFQVPEVRKFTP	VVT(0.131)T(0.143)HS(0.556)S(0.193)GWDPS(0.965)PGAS(0.012)FQVPEVR	3.79899	0.0358058	up
Q6ZPZ3	KPAPKTGTGSPFAGNSPAREGEQDAGSLKDV	T(0.001)GT(0.002)GS(0.004)PFAGNS(0.993)PAR	3.79678	0.0336832	up
Q99PU5	SQTSSLIDGQTLSKESPSHGLELSAPEKARA	ES(0.739)PS(0.258)HGLELS(0.002)APEK	3.74774	0.0217191	up
Q9EPJ9	FGSAEPPKAKSPSSDSWTCADASTGRRSSDS	SPS(0.003)S(0.044)DS(0.892)WT(0.06)CADASTGR	3.7431	0.045999	up
Q7TSI3	PVSKEADMSSIQIPSSPPAHGSPQLRSQDPT	EADMS(0.001)S(0.004)IQIPS(0.055)S(0.94)PPAHGSPQLR	3.7129	0.0194863	up
P97393	SPVETWKGGIDNPAITSDQEVDDKKIKKKTH	GGIDNPAIT(0.504)S(0.496)DQEVDDKK	3.68204	0.021516	up
Q9JLM8	HGGSSTSLSSTKVCSSMDENDGPGEGDELGR	VCS(0.5)S(0.5)MDENDGPGEGDELGR	3.66956	0.0385178	up
P62754	KEKRQEQIAKRRRLSSLRASTSKSESSQK__	LS(0.017)S(0.982)LRAS(0.928)T(0.059)S(0.013)K	3.66876	0.0252006	up
P62754	QEQIAKRRRLSSLRASTSKSESSQK______	LS(0.017)S(0.982)LRAS(0.928)T(0.059)S(0.013)K	3.66876	0.0252006	up
Q61290	EAFNQKHALQKAKEVSPMSAPNMPSIERDRR	EVS(0.999)PMS(0.001)APNMPSIER	3.66495	0.0214822	up
Q8CHC4	TLKSPDWIKHLEEEMSLEKISVTLPSSASST	HLEEEMS(1)LEK	3.62295	0.0276108	up
Q9WV92	ASVSENHEIYMKDSVSAAEVGTGQYATTKGI	DS(0.448)VS(0.552)AAEVGTGQYATTK	3.6022	0.026015	up
P20357	ITTKDTSPEKTEKGLSSVPEVAEVEPTTKAD	GLS(0.5)S(0.5)VPEVAEVEPTTK	3.52944	0.00544914	up
Q6A065	PTRTSLLRRARLGEASDSELADADKASVASE	LGEAS(0.783)DS(0.217)ELADADK	3.48573	0.00348514	up
Q8BZB3	PAPLAQPTPLGSVQTSPELEHRVSLFNQKNQ	ALDPAPLAQPT(0.004)PLGS(0.012)VQT(0.244)S(0.741)PELEHR	3.47854	0.00785328	up
Q9Z1B3	EDEEEVKKEADPGETSSEAPSETRTTPAENG	EADPGET(0.021)S(0.796)S(0.181)EAPS(0.001)ETR	3.47706	0.00495353	up
Q9R0P9	DGSVLKQFLSETEKLSPEDRAKCFEKNEAIQ	QFLS(0.004)ET(0.018)EKLS(0.978)PEDR	3.46077	0.00377139	up
Q91VN4	EEERVRVLQGIRLSESVVNRMKDCSQPSAGE	LSES(1)VVNR	3.29365	0.00799702	up
Q9CT10	STKFVFGQNMSERVLSPPKLNEANSDTSRET	VLS(1)PPKLNEANSDTSR	2.44208	0.0281807	up
Q8BGU5	NAHSRLESYRPDTDLSREDTGCNLQHISDRE	LES(0.028)Y(0.001)RPDT(0.07)DLS(0.67)REDT(0.231)GCNLQHISDR	2.37462	0.00565541	up
Q61686	SNSADDIKSKKKREQSNDIARGFERGLEPEK	EQS(1)NDIAR	2.34112	0.0469906	up
Q5RJI5	KSMEVLSITDAGSGGSPVPTRRALEMAQHSQ	SMEVLS(0.001)IT(0.002)DAGS(0.222)GGS(0.703)PVPT(0.073)R	2.24561	0.0205355	up
Q80TL4	GRGVEPEEFDRTSRFTPPAFIRPTRKLDDDK	FT(1)PPAFIRPTR	2.24301	0.0445369	up
Q1HFZ0	GLEVLGEKKKEGVILTNENAASPEQPGDEDA	EGVILT(0.5)NENAAS(0.5)PEQPGDEDAK	2.22185	0.0158345	up
Q3UUG6	SSLISHCSSDPADRLSPFLAARHFNLPSKTE	LS(1)PFLAAR	2.20634	0.0353388	up
Q3UQ44	ALESSDLVAVQNQLRSPTIGFNNLDEAHVDR	S(0.647)PT(0.353)IGFNNLDEAHVDR	2.20199	0.0103702	up
P58771	DRKYEEVARKLVIIESDLERAEERAELSEGK	LVIIES(1)DLER	2.19759	0.039456	up
Q7TQE6	ENHINSKRLNNDLVGSTENLLKEDSCTASSK	LNNDLVGS(0.785)T(0.215)ENLLK	2.15899	0.0385244	up
Q8VE33	TFTGEHVVALMPEAGSPQHARVLQYRELLDA	TFTGEHVVALMPEAGS(1)PQHAR	2.14513	0.0349257	up
Q9ER47	GFKFPGLRVLTYRKQSLPQEDPDVVVIDSSK	KQS(1)LPQEDPDVVVIDSSK	2.07084	0.025684	up
Q80UG2	RTSASKYENMIRYTGSPDSLRSRTPMITPDL	Y(0.004)T(0.011)GS(0.986)PDS(0.999)LR	2.0587	0.0486167	up
Q6ZQ29	LQCRQYKRKMLLARHSLDQDLLREDLNKKQT	HS(1)LDQDLLR	2.05264	0.0482399	up
Q5SV85	HPPAAATKYDVFKQLSLEGAGLAMEEFKENT	QLS(1)LEGAGLAMEEFK	2.04978	0.024436	up
Q6QI06	RGRSLKNLRIRGRNDSGEENVPLDLTREPSD	NDS(1)GEENVPLDLTR	2.04607	0.0177322	up
A2AJI0	PTATGPREAKPSRRSSQPSPTTVPASDSPPA	RS(0.213)S(0.757)QPS(0.019)PT(0.006)T(0.006)VPASDSPPAK	2.02473	0.0417304	up
Q4KMM3	STVSGIRPARVVSSTSEEEEAFTEKFLKINC	VVS(0.963)S(0.041)T(0.045)S(0.951)EEEEAFTEK	2.0182	0.0159729	up
Q60575	THTFNREFSQVHGSISDCKLSDISPIGRDPS	EFSQVHGS(0.016)IS(0.984)DCK	2.01455	0.0319451	up
Q9WTR6	SKGGYLQGNMSGRLPSMGDQEPPGQEKVVLK	LPS(1)MGDQEPPGQEK	1.94173	0.0396842	up
A2A690	RFSPPPVGGQSKEYPSPPPSPLRRGPQYRAS	EY(0.009)PS(0.986)PPPS(0.005)PLR	1.91215	0.0324503	up
P35689	SKERNSGATADAGSISPRTCAAIQKALDDDN	NSGATADAGS(0.123)IS(0.877)PR	1.86818	0.0375111	up
Q6DFW4	KKKKDKKKHIKEEPLSEEEPCTSTAVPSPEK	HIKEEPLS(0.999)EEEPCT(0.001)STAVPSPEK	1.8345	0.0355606	up
Q3UCQ1	LAVIQEARFAQSAPGSPLSSQPVLITVQRQL	FAQS(0.008)APGS(0.682)PLS(0.23)S(0.081)QPVLITVQR	1.81131	0.0317906	up
O88703	TARTAAPSPDRRDSASPGAASGLDPLDSARS	DS(0.463)AS(0.537)PGAASGLDPLDSAR	1.75907	0.0484822	up
Q9QXS6	FGDQRDEEEESQMKKSESEVEEAAAIIAQRP	KS(0.787)ES(0.213)EVEEAAAIIAQRPDNPR	1.69602	0.0499315	up
Q91ZU6	RAGSKAGSRASSRRGSDASDFDISEIQSVCS	RGS(0.927)DAS(0.073)DFDISEIQSVCSDVETVPQTHRPVPR	1.45689	0.0238582	up
P31650	ALPLGNGKAAEEARGSETLGGGGGGAAGTRE	GS(0.938)ET(0.062)LGGGGGGAAGTR	1.43006	0.0379311	up
P63101	ESKVFYLKMKGDYYRYLAEVAAGDDKKGIVD	Y(1)LAEVAAGDDKK	1.25447	0.0490987	up
Q8VD37	VAVNTEEKWVHFSDASPEHVTPELTPREQVV	WVHFSDAS(1)PEHVTPELTPR	1.04116	0.0154426	up
Q9Z0J4	VRFNSVSSYSDSRKSSGDGPDLRDNFESTGP	KS(1)S(1)GDGPDLR	-1.39544	0.0479362	down
Q8BG39	VSFALPSAEKDMCLSSSKKGMLGLIVYLGMM	DMCLS(0.193)S(0.717)S(0.09)K	-2.00435	0.0365326	down
Q80XK6	HPASLQKAALSSRSASVDESRPEFICRLALG	S(0.018)AS(0.98)VDES(0.002)RPEFICR	-2.21747	0.0280136	down
Q80TE4	LVEEGRRKFSFYGNVSPRRSLYRTLSDESVC	FSFYGNVS(1)PR	-3.58365	0.0134505	down
Q8BLQ9	EDAPDADTAIINAEGSQVNAEEKKEYFI___	GAEDAPDADT(0.004)AIINAEGS(0.996)QVNAEEK	-3.63921	0.0164021	down
P97352	VSTFFTFAGREGRKGSLNINEFKELATQQLP	KGS(1)LNINEFK	-3.64023	0.0123159	down
Q61151	SRKSVRKARQKRSQSSSQFRSQGKPIELTPL	S(0.004)QS(0.149)S(0.698)S(0.149)QFR	-3.66108	0.015968	down
Q4ACU6	YSAVPGRKFIAVKAHSPQGEGEIPLHRGEAV	AHS(1)PQGEGEIPLHR	-3.68713	0.0413096	down
P70663	ENHPSDKAEKPSALNSEEETHEQSTEQDKTY	AEKPS(0.069)ALNS(0.753)EEET(0.178)HEQSTEQDK	-3.72983	0.0235342	down
O08553	TQRIVAPPGGRANITSLG_____________	ANITS(1)LG	-3.81158	0.0458204	down
Q9JKF6	QHHPPMAQNLQYPDDSDDEKKAGPLGGSSYE	AGIPQHHPPMAQNLQY(0.01)PDDS(0.99)DDEKK	-3.94998	0.0354744	down
Q9QXZ0	LTTIKDTQDIVHDLESPGIDPSIIKQQVEAA	DTQDIVHDLES(0.997)PGIDPS(0.002)IIK	-4.06245	0.0442348	down
Q60902	PQVLSPDMVPPSERGTPIPDSSSTLASGEFT	GT(0.995)PIPDS(0.002)S(0.001)S(0.001)TLASGEFTGVK	-4.42856	0.0045753	down
