# Supplementary material for: Phosphoproteomic analysis reveals the effects of sleep deprivation on the hippocampus in mice
Source: Royal Society of Chemistry journal article supplement (doi:10.1039/d2mo00061j), 2022-06-27
Supplement: d2mo00061j3.xlsx [file d2mo00061j3.xlsx]

## Sheet: sd vs con 
Protein.IDs	Protein.names	log2(Fold change)	p-value	sig
P70349	Histidine triad nucleotide-binding protein 1	3.60725	0.0302489	up
P26350	Prothymosin alpha;Prothymosin alpha, N-terminally processed;Thymosin alpha	3.32856	0.0193258	up
Q7TNH6	Nephrocystin-3	3.29388	0.0175508	up
Q9CWK8	Sorting nexin-2	3.00969	0.00638633	up
P56695	Wolframin	2.94813	0.0168826	up
Q9D892	Inosine triphosphate pyrophosphatase	2.67896	0.00597246	up
Q9WTT4	V-type proton ATPase subunit G 2	1.89781	0.00715662	up
P14148	60S ribosomal protein L7	1.81893	0.00229448	up
Q60817	Nascent polypeptide-associated complex subunit alpha	1.69452	0.0256219	up
P48678	Prelamin-A/C;Lamin-A/C	1.65812	0.0049475	up
O70194	Eukaryotic translation initiation factor 3 subunit D	1.49412	0.0156853	up
Q6ZWQ0	Nesprin-2	1.37752	0.00900597	up
P42932	T-complex protein 1 subunit theta	1.22415	0.00754719	up
Q9R0P5	Destrin	1.13788	0.0120932	up
P97807	Fumarate hydratase, mitochondrial	-1.00286	0.0115434	down
Q91XM9	Disks large homolog 2	-1.05354	0.0402546	down
Q9QYB8	Beta-adducin	-1.11565	0.0275179	down
P47740	Fatty aldehyde dehydrogenase	-1.5187	0.0322136	down
Q8BH66	Atlastin-1	-1.52618	0.044078	down
Q99JY9	Actin-related protein 3	-1.53329	0.0321183	down
O70133	ATP-dependent RNA helicase A	-1.6544	0.0339116	down
Q9QVP9	Protein-tyrosine kinase 2-beta	-1.79295	0.0349288	down
Q3TQB2	FAD-dependent oxidoreductase domain-containing protein 1	-2.21489	0.0390653	down
P25444	40S ribosomal protein S2	-3.0628	0.0352602	down
Q8BH04	Phosphoenolpyruvate carboxykinase [GTP], mitochondrial	-3.41159	0.0349212	down
Q8BPN8	DmX-like protein 2	-3.57084	0.0363552	down
O55023	Inositol monophosphatase 1	-3.62135	0.03875	down
